# Supplementary material
Source: PubMed Central journal article supplement (PMC8692849)
Supplement: S0899823X2100502Xsup001.pdf [file S0899823X2100502Xsup001.pdf]

Supplementary figure

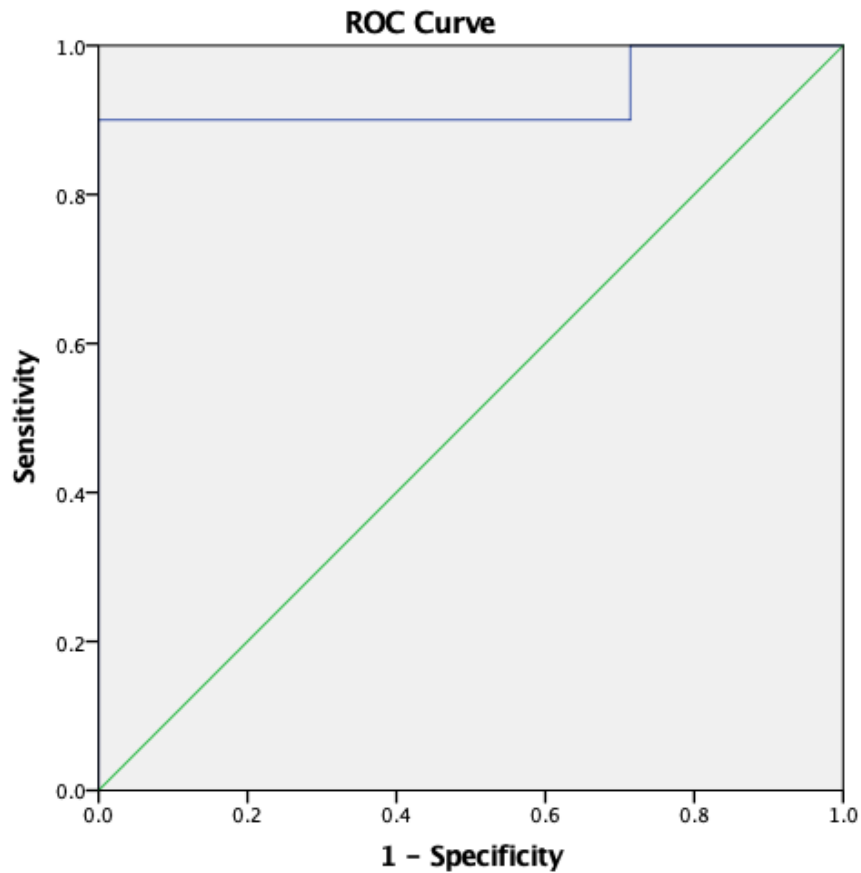

**Supplementary Figure.** Receiver operating characteristic curve of cycle threshold value (Ct) for persistent infectivity on Day 10 of COVID-19 infection among 19 elderly individuals. The area under the curve (AUC) for the use of Ct value to discriminate between patients with and without persistent infectivity on Day 10 of COVID-19 infection was 0.93 (95% confidence interval, 0.79 to 1.00).
